# Supplementary material for: Enrichment of Sialylated IgG by Lectin Fractionation Does Not Enhance the Efficacy of Immunoglobulin G in a Murine Model of Immune Thrombocytopenia
Source: PubMed Central journal article supplement (PMC3121734; doi:10.1371/journal.pone.0021246), 2011-06-23
Supplement: pone.0021246.s001.pdf [file pone.0021246.s001.pdf]

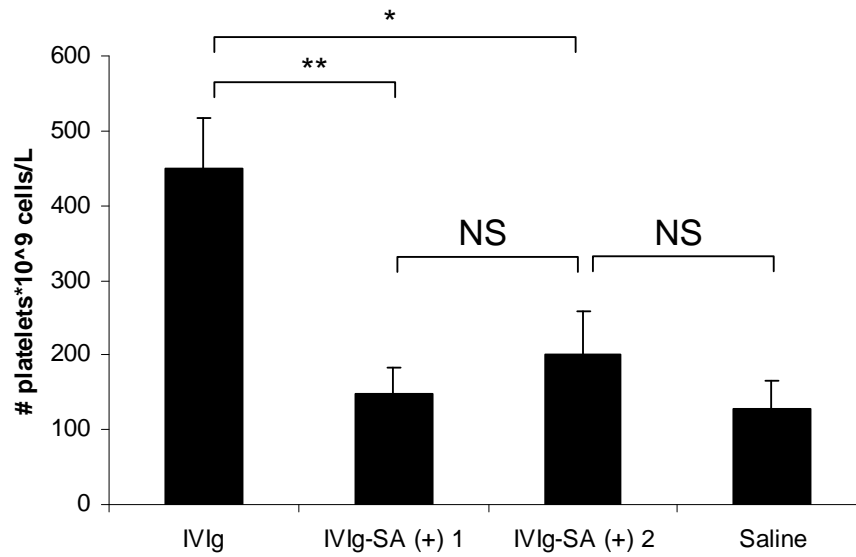

**Figure S1. Measured platelet count at t=16 hours after high dose IVIg pre-treatment.**

Pre-treatment with a high dose (1.5 g/kg) of IVIg, IVIg-SA (+) 1, IVIg-SA (+) 2, or Saline as described in the text below. Results are depicted as mean with error bars representing standard error of mean (SEM), (n = 9). \*\* P < 0.01, \* P < 0.05.
