# Supplementary material for: Enrichment of Sialylated IgG by Lectin Fractionation Does Not Enhance the Efficacy of Immunoglobulin G in a Murine Model of Immune Thrombocytopenia
Source: PubMed Central journal article supplement (PMC3121734; doi:10.1371/journal.pone.0021246), 2011-06-23
Supplement: pone.0021246.s002.pdf [file pone.0021246.s002.pdf]

**Table S1.** IgG subclass distribution in IVIg fractions (in %).

|      | IVIg | IVIg SA(-) | IVIg SA(+) |
|------|------|------------|------------|
| IgG1 | 62   | 62.5       | 70         |
| IgG2 | 34   | 35.3       | 27         |
| IgG3 | 3.4  | 1.8        | 1.9        |
| IgG4 | 0.6  | 0.4        | 1.1        |
